# Supplementary material
Source: PubMed Central journal article supplement (PMC7660381)
Supplement: mmc1.pdf [file mmc1.pdf]

**PATTER, Volume 1**

## **Supplemental Information**

**A Learning-Based Model to Evaluate**

**Hospitalization Priority**

**in COVID-19 Pandemics**

**Yichao Zheng, Yinheng Zhu, Mengqi Ji, Rongpin Wang, Xinfeng Liu, Mudan Zhang, Jun Liu, Xiaochun Zhang, Choo Hui Qin, Lu Fang, and Shaohua Ma**

Supplemental Information

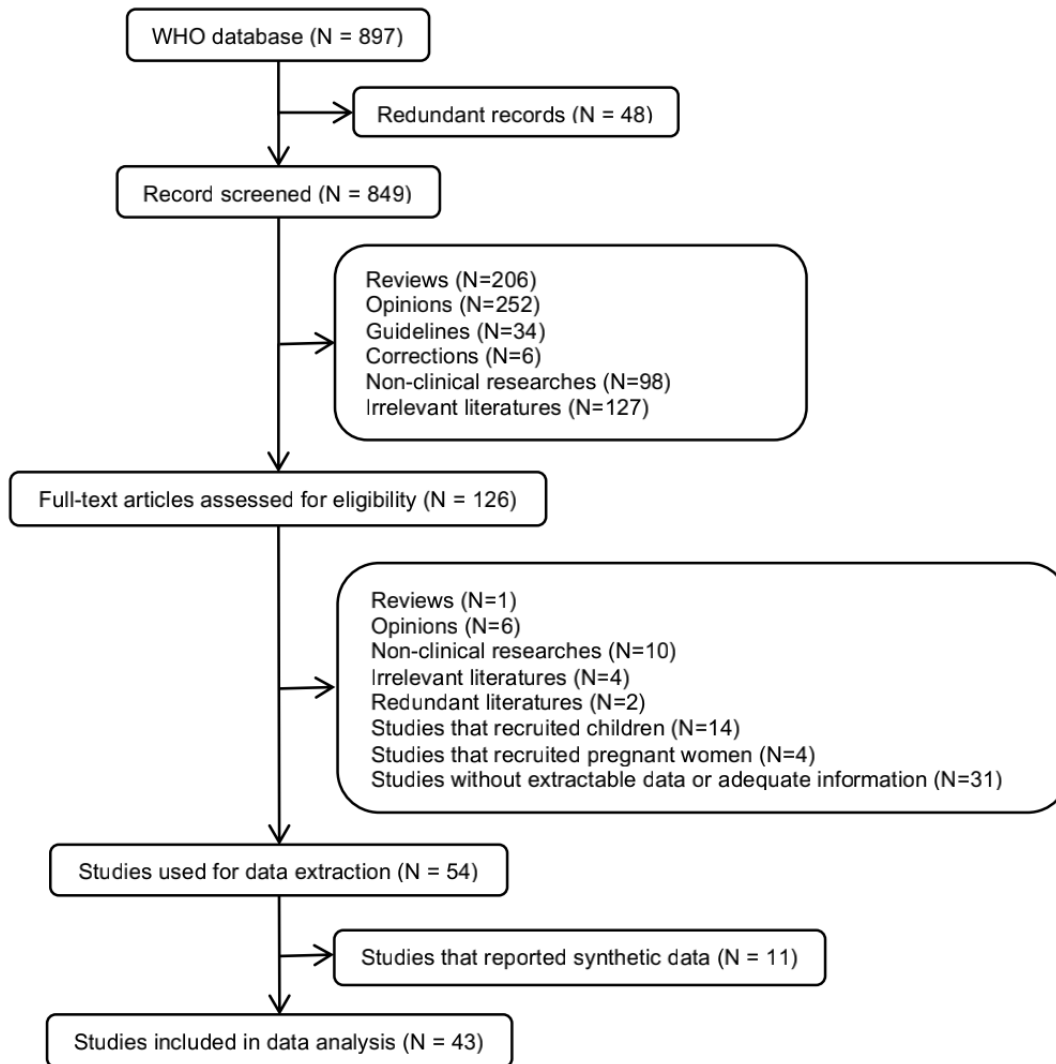

Figure S1. Flowchart of the study inclusion and exclusion

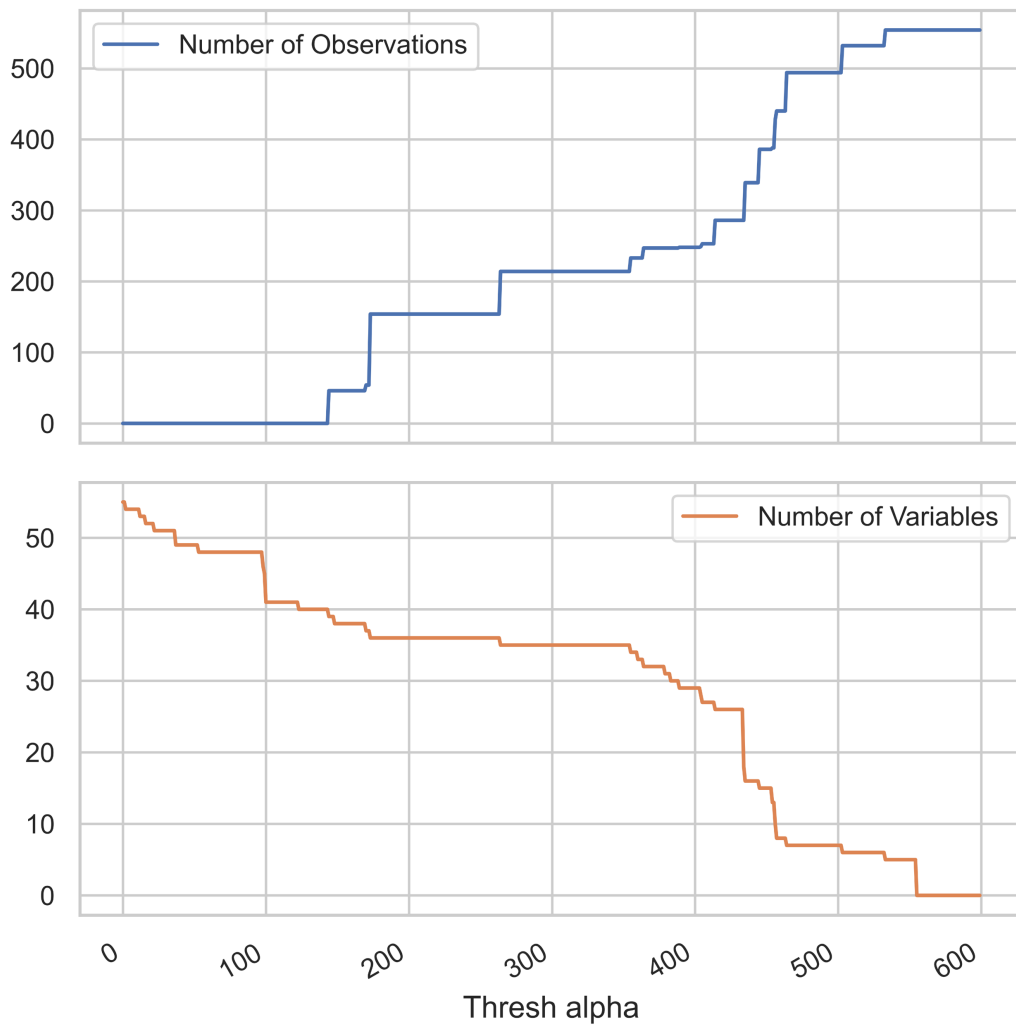

Figure S2. Strategy to remove the missing values. In this first step, the variables with missing data that exceeded the threshold alpha were removed (bottom figure). Next, observations (that were COVID-19 cases) with missing data for any of the resulting variables were removed.

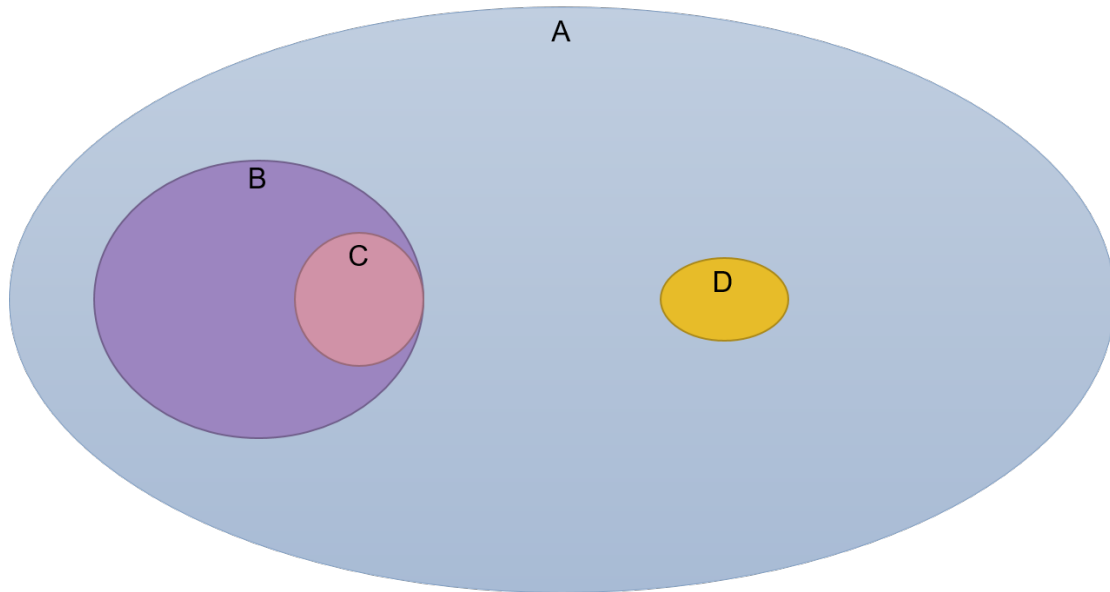

Figure S3. Venn Diagram.

The Venn Diagram was used to represent the relationship of different case sets. Set A contained all the 601 cases; Set B contained the 214 cases after removing the missing values (Figure S2). Set C was a subset of the set B and contained 65 cases that were used for the holdout testing. Set D contained the 39 progressed severe cases, which had no missing values in term of the selected 4 variables and had no intersection with the Set B. The 4 selected variables were lymphocyte, lactic dehydrogenase, C-reactive protein and neutrophil.

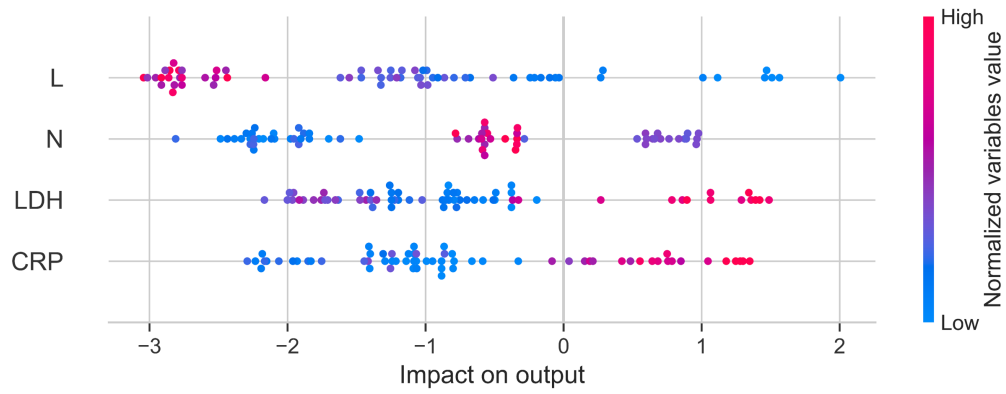

Figure S4. SHapley Additive exPlanations (SHAP) Plot of the key variables identified to construct the model. The SHAP values were plotted to visualize how the value of each variable would impact the prediction of disease severity. Each dot corresponded to an individual patient in the study. And the colors encoded the values of key variables, while the SHAP values represented the impact of key variables on the prediction. Abbreviations: L, lymphocyte; LDH, lactic dehydrogenase; CRP, C-reactive protein; N, neutrophil.

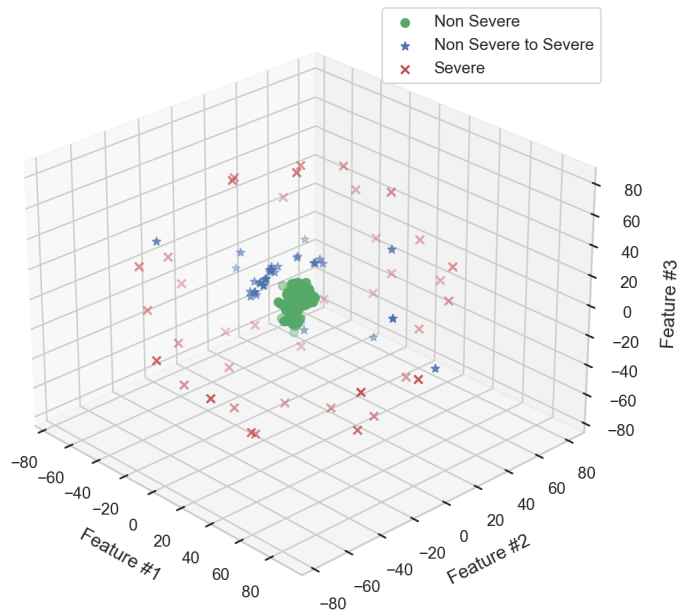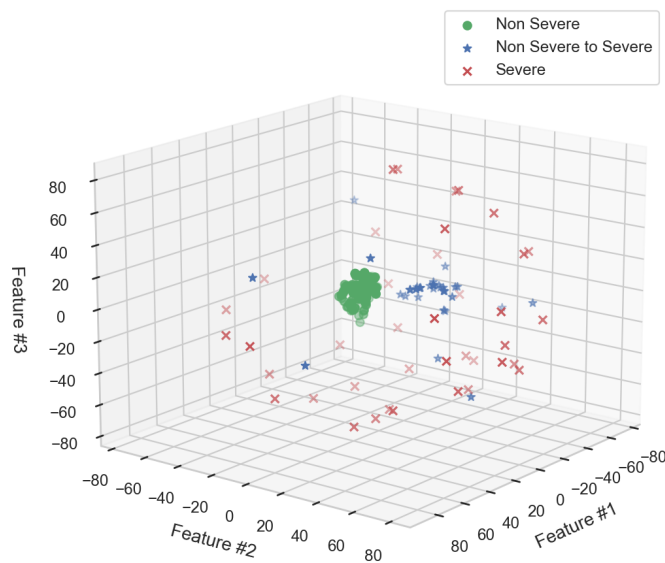

Figure S5. t-SNE visualization

The 3D scatter visualization was generated through the t-SNE algorithm, which projected 4D (lymphocyte, lactic dehydrogenase, C-reactive protein, neutrophil) samples into a 3D feature space. The space was defined by the first, second and third component (Features #1, #2, and #3). The green dots, blue stars and red crosses denoted the non-severe, progressed severe (non-severe to severe progression) and severe cases respectively. Green dots clustered in the center while red crosses scattered in the outer layer; the blue stars located in-between.

\* **Usage:** This is intended for use in assessment of hospitalization priority due to the risk of severe COVID-19. By filling the values of four parameters in the required fields and comparing the output value with the cutoff value of 0.5, the risk of developing severe COVID-19 can be expected.

\* **Disclaimer:** The assessment is based on a method proposed in Our Research Paper (<https://www.ncbi.nlm.nih.gov/pmc/articles/PMC7396968/>). Note that the assessment is not a substitute for professional diagnosis and should not be used as an alternative to professional healthcare.

\* **Privacy Policy:** We will not collect, storage and use any users' data. But if you want to contribute to this project with your data to improve this assessment model, please fill this Data Collecting Table and send it to Yinheng Zhu by the email of zhuyh19@mails.tsinghua.edu.cn.

\* **Source Code and Dataset:** [https://github.com/cow8/Covid-19\\_Severity](https://github.com/cow8/Covid-19_Severity)

Input values:

Lymphocyte count,  $10^9/L$ :  (tested in [0.11, 3.67])

Lactic DeHydrogenase(LDH), U/L:  (tested in [82.5, 658.7])

C-Reactive Protein(CRP), mg/L:  (tested in [0.1, 210])

Neutrophil count(N),  $10^9/L$ :  (tested in [0.64, 18.82])

\* Age tested in [19,84]

\* if above factors(e.g. Lymphocyte count, age) is outside tested interval, please refer to our paper to check if it's suitable for usage of this model.

0 visitors have used this tool.

Thanks [Alexander](#) for his [tutorial](#) on deployment of machine learning tool.

Figure S6. Interface of the online COVID-19 assessment program. (urls: covid-19.zyh.science:8888)

Table S1 List of eligible literature in WHO COVID-19 database

| No. | Title                                                                                                                                     |
|-----|-------------------------------------------------------------------------------------------------------------------------------------------|
| 1   | COVID-19: Serial CT Findings                                                                                                              |
| 2   | COVID-19 in Taiwan                                                                                                                        |
| 3   | 2019-nCoV severe adult respiratory distress syndrome in two cases in Italy                                                                |
| 4   | A familial cluster of pneumonia associated with the 2019-nCoV indicating person-to-person transmission                                    |
| 5   | A Locally Transmitted Case of SARS-CoV-2 Infection in Taiwan                                                                              |
| 6   | Analysis of the first cluster of cases in a family of novel coronavirus pneumonia in Gansu Province                                       |
| 7   | Asymptomatic cases in a family cluster with SARS-CoV-2 infection                                                                          |
| 8   | Asymptomatic novel coronavirus pneumonia patient outside Wuhan                                                                            |
| 9   | Case of the Index Patient Who Caused Tertiary Transmission of Coronavirus Disease 2019 in Korea                                           |
| 10  | Changes of CT findings in a 2019-nCoV pneumonia patient                                                                                   |
| 11  | Chest CT for Typical 2019-nCoV Pneumonia: Relationship to Negative RT-PCR Testing                                                         |
| 12  | Clinical and biochemical indexes from 2019-nCoV infected patients linked to viral loads and lung injury                                   |
| 13  | Clinical characteristics and therapeutic procedure for four cases with COVID-19 receiving combined Chinese and Western medicine treatment |
| 14  | Clinical Features and Treatment of 2019-nCov Pneumonia Patients in Wuhan: Report of A Couple Cases                                        |
| 15  | Clinical Features of Atypical COVID-19 with an initially Negative RT-PCR Assay                                                            |
| 16  | CT features of 2019-novel coronavirus pneumonia                                                                                           |
| 17  | CT Imaging of the COVID-19                                                                                                                |
| 18  | CT Manifestations of Two Cases of 2019-nCoV Pneumonia                                                                                     |
| 19  | Early transmission patterns of COVID-19 in travellers from Wuhan to Thailand                                                              |
| 20  | Evolution of CT Manifestations in a Patient Recovered from COVID-19 in Wuhan                                                              |
| 21  | Evaluation of coronavirus in tears and conjunctival secretions of patients with SARS-CoV-2 infection                                      |
| 22  | First Atypical case of 2019 novel coronavirus in Yan'an                                                                                   |
| 23  | First Case of 2019 Novel Coronavirus in the US                                                                                            |
| 24  | First case of COVID-19 in Taiwan                                                                                                          |
| 25  | First cases of COVID-19 in France                                                                                                         |
| 26  | First imported case of 2019 novel coronavirus in Canada                                                                                   |
| 27  | Identification of a novel coronavirus causing severe pneumonia in human                                                                   |
| 28  | Importation and Human-to-Human Transmission                                                                                               |
| 29  | Journey of a Thai Taxi Driver and Novel Coronavirus                                                                                       |
| 30  | Novel Coronavirus Pneumonia Outbreak in 2019                                                                                              |
| 31  | Pathological findings of COVID-19 associated with ARDS                                                                                    |
| 32  | Pre- and Posttreatment Chest CT Findings                                                                                                  |
| 33  | Pulmonary pathology of early phase COVID-19 in two patients with lung cancer                                                              |
| 34  | RNA based mNGS approach identifies a novel human coronavirus from two individual pneumonia cases in 2019 Wuhan outbreak                   |
| 35  | SARS-CoV-2 Viral Load in Upper Respiratory Specimens of Infected Patients                                                                 |
| 36  | The COVID-19 with onset of oculomotornerve palsy                                                                                          |
| 37  | The course of clinical diagnosis and treatment of a case infected with COVID-19                                                           |
| 38  | The first 2019 novel coronavirus case in Nepal                                                                                            |
| 39  | The First Case of COVID-19 Imported into Korea from Wuhan                                                                                 |
| 40  | The first Vietnamese case of COVID-19 acquired from China                                                                                 |
| 41  | The report of two cases infection with 2019-ncov after kidney transplantation                                                             |
| 42  | Two clinical cases of NCP in renal transplant recipients                                                                                  |
| 43  | Viral Load Kinetics of SARS-CoV-2 Infection in First Two Patient                                                                          |



Table S2. Univariate analysis of difference in clinical variables between severe and non-severe COVID-19 cases excluding missing values

| Clinical features                                 | P values |
|---------------------------------------------------|----------|
| Age                                               | < 0.001  |
| Gender                                            | 0.708    |
| Underlying comorbidities                          |          |
| Hypertension                                      | 0.994    |
| Endocrine diseases                                | 0.998    |
| Cardiovascular diseases                           | 0.955    |
| Chronic lung diseases                             | 0.391    |
| Gastrointestinal or hepatobiliary diseases        | 0.326    |
| Cerebrovascular diseases or neurological disorder | 1.000    |
| Immune disorder                                   | 1.000    |
| Others                                            | 0.814    |
| Signs or symptoms                                 |          |
| Fever                                             | 0.003    |
| Cough                                             | 0.072    |
| Dyspnea                                           | < 0.001  |
| Fatigue                                           | 0.073    |
| Nausea or emesis                                  | 0.864    |
| Myalgia                                           | 1.000    |
| Dizziness or headache                             | 0.955    |
| Laboratory findings                               |          |
| White blood cell                                  | 0.100    |
| Lymphocyte                                        | < 0.001  |
| Neutrophil                                        | < 0.001  |
| C-reactive protein                                | < 0.001  |
| Lactate dehydrogenase                             | < 0.001  |
| D-dimer                                           | 0.001    |
| Alanine aminotransferase                          | 0.003    |
| Aspartate aminotransferase                        | < 0.001  |
| Total bilirubin                                   | 0.160    |
| Albumin                                           | < 0.001  |
| Serum creatinine                                  | 0.395    |
| Creatine kinase                                   | < 0.001  |

Table S3. Definition of the evaluation metrics.

| <b>Metrics</b>     | <b>Definition</b>                                                                           |
|--------------------|---------------------------------------------------------------------------------------------|
| <b>Accuracy</b>    | $\frac{TP + TN}{TP + TN + FP + FN}$                                                         |
| <b>Sensitivity</b> | $\frac{TP}{TP + FN}$                                                                        |
| <b>Specifity</b>   | $\frac{TN}{TN + FP}$                                                                        |
| <b>F1 weighted</b> | $\frac{1}{TP + FP} * \frac{2TP}{TP + FN + 1} + \frac{1}{TN + FN} * \frac{2TN}{TN + FP + 1}$ |

Abbreviations: TP, true positive; TN, true negative; FP, false positive; FN, false negative

Table S4. Previously validated Single-tree XGBoost model for identification of severe COVID-19 risk. A decision rule using three key features and their thresholds in absolute values was shown in the figure and the performance of the single-tree XGBoost model in identification of severe COVID-19 cases on admission was shown in the table.

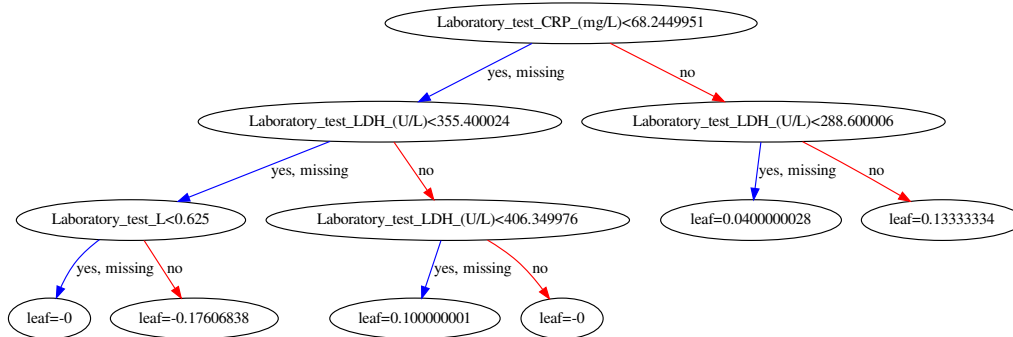

| AUC   | F1 weighted | Accuracy | Sensitivity | Specificity |
|-------|-------------|----------|-------------|-------------|
| 0.680 | 0.769       | 0.800    | 0.231       | 0.942       |

Abbreviations: L, lymphocyte; LDH, lactic dehydrogenase; CRP, C-reactive protein; AUC: area under the curve.
